# Supplementary material for: Computational analysis of the vibrational spectra and structure of aqueous cytosine
Source: Royal Society of Chemistry journal article supplement (doi:10.1039/d3cp03059h), 2023-01-01
Supplement: d3cp03059h2.pdf [file d3cp03059h2.pdf]

# Computational Analysis of Vibrational Spectra and Structure of Aqueous Cytosine

Sergey A. Katsyuba,\* Timur I. Burganov

*Arbuzov Institute of Organic and Physical Chemistry, FRC Kazan Scientific Centre of RAS, Arbuzov st. 8, 420088  
Kazan, Russia.*

## Supporting information

Contents:

|                                                                                                                                                                                                                |     |
|----------------------------------------------------------------------------------------------------------------------------------------------------------------------------------------------------------------|-----|
| Figure S1. IR spectra of cytosine-d <sub>3</sub> simulated with the use of three different DFT methods                                                                                                         | S3  |
| Table S1. Frequencies and IR intensities of the strongest bands in the spectra of cytosine                                                                                                                     | S4  |
| Table S2. Frequencies and IR intensities of the strongest bands in the spectra of cytosine-d <sub>3</sub>                                                                                                      | S4  |
| Figure S2. IR spectra of cytosine-d <sub>3</sub> , explicitly solvated with D <sub>2</sub> O molecules, simulated with the use of B97-3c method                                                                | S5  |
| Figure S3. IR spectra of cytosine and cytosine-d <sub>3</sub> , explicitly solvated with H <sub>2</sub> O and D <sub>2</sub> O molecules, respectively, simulated with the use of PBE/def2-TZVP method         | S6  |
| Figure S2a. IR spectra of cytosine-d <sub>3</sub> , explicitly solvated with heavy water molecules ( $m_H = m_O = 400$ aem, see main text), simulated with the use of B97-3c method.                           | S7  |
| Figure S3a. IR spectra of cytosine and cytosine-d <sub>3</sub> , explicitly solvated with heavy water molecules ( $m_H = m_D = m_O = 400$ aem, see main text), simulated with the use of PBE/def2-TZVP method. | S8  |
| Figure S4. IR spectra of cytosine, explicitly solvated with heavy water molecules ( $m_H = m_O = 400$ aem, see main text), simulated with the use of B97-3c method.                                            | S9  |
| Figure S5. B3LYP/def2-TZVP calculated IR spectra of various clusters cytosine:30H <sub>2</sub> O                                                                                                               | S10 |
| Figure S6. B3LYP/def2-TZVP calculated IR spectra of various clusters cytosine-d <sub>3</sub> :30D <sub>2</sub> O                                                                                               | S11 |
| Figure S7. Raman spectra of cytosine-d <sub>3</sub> , explicitly solvated with heavy water molecules ( $m_D = m_O = 400$ aem, see main text), simulated with the use of PBE/def2-TZVP method                   | S12 |
| Figure S8. Raman spectra of cytosine-d <sub>3</sub> , explicitly solvated with heavy water molecules ( $m_D = m_O = 400$ aem, see main text), simulated with the use of B3LYP/def2-TZVP method                 | S13 |
| Figure S9. Raman spectra of cytosine, explicitly solvated with heavy water molecules ( $m_D = m_O = 400$ aem, see main text), simulated with the use of B3LYP/def2-TZVP method                                 | S14 |

|                                                                                                                                                                                                           |     |
|-----------------------------------------------------------------------------------------------------------------------------------------------------------------------------------------------------------|-----|
| Table S3. Non-scaled frequencies and relative Raman intensities of the strongest bands in the spectra of cytosine-d <sub>3</sub> computed for various clusters cytosine-d <sub>3</sub> -6D <sub>2</sub> O | S15 |
| Figure S10. B3LYP/def2-TZVP calculated Raman spectra of various clusters cytosine:30H <sub>2</sub> O                                                                                                      | S16 |
| Figure S11. B3LYP/def2-TZVP calculated Raman spectra of various clusters cytosine-d <sub>3</sub> :30D <sub>2</sub> O                                                                                      | S18 |
| Figure S12. Raman spectra of cytosine, explicitly solvated with 30 water molecules, simulated with the use of B3LYP-D3/def2-TZVP and B3LYP-D3/aug-cc-pVDZ                                                 | S20 |
| Figure S13. IR spectra simulated for clusters cytosine-d <sub>3</sub> :4D <sub>2</sub> O and cytosine-d <sub>3</sub> :30D <sub>2</sub> O                                                                  | S21 |

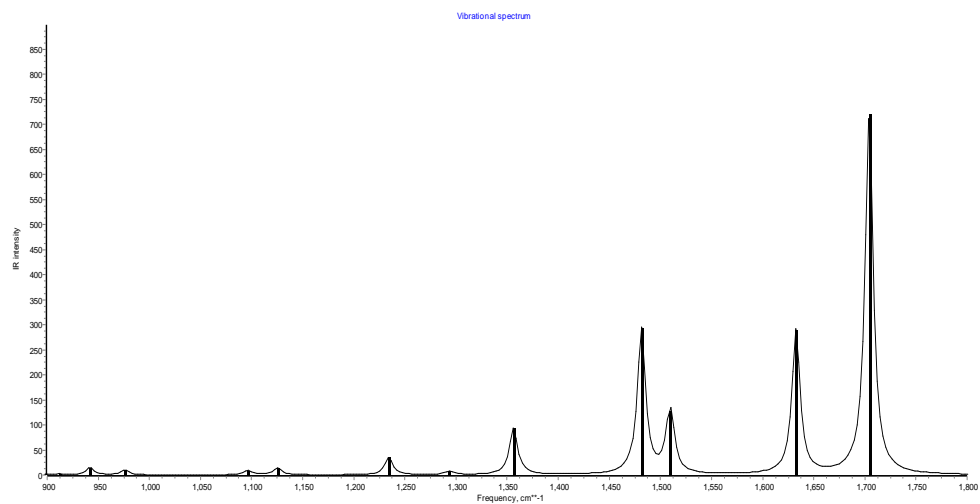

PBE/aug-cc-pVDZ

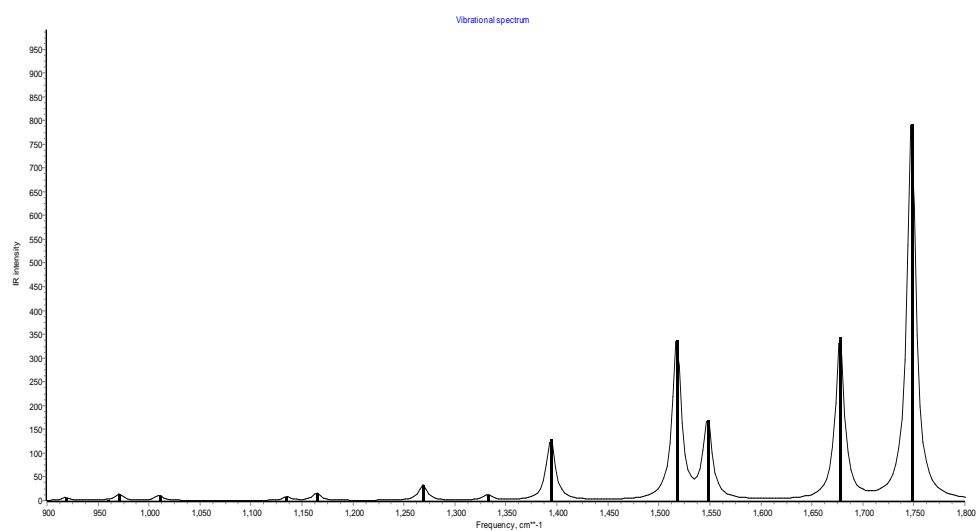

B3LYP/aug-cc-pVDZ

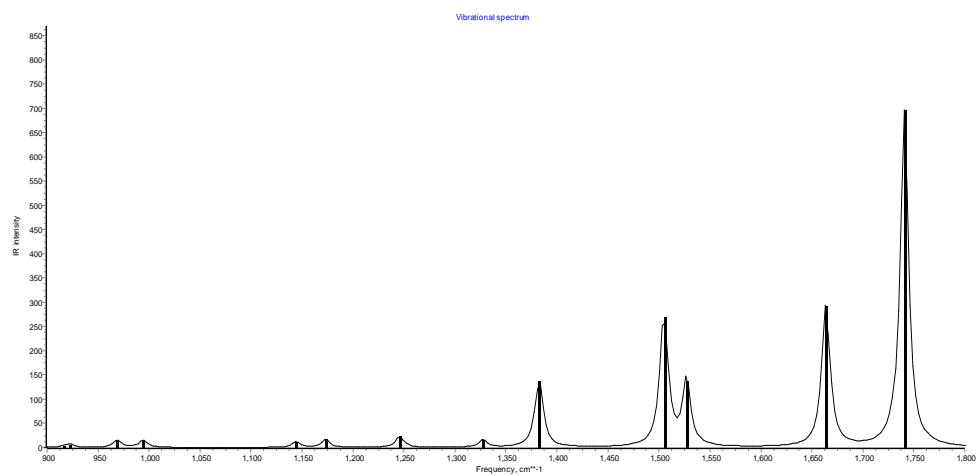

B97-3c

**Figure S1.** IR spectra of cytosine- $\text{d}_3$  simulated with the use of three different DFT methods.

**Table S1.** Frequencies ( $\nu/\text{cm}^{-1}$ ) and relative IR intensities ( $I_{\text{rel}}$ ) of the strongest bands in the spectra of cytosine (spectral region  $1100\text{-}1800\text{ cm}^{-1}$ ).

| Ar<br>matrixОшибка!<br>Закладка не<br>определена. |                  | B3LYP/def2-<br>TZVP |                  |
|---------------------------------------------------|------------------|---------------------|------------------|
| $\nu$                                             | $I_{\text{rel}}$ | $\nu$               | $I_{\text{rel}}$ |
| 1124                                              | 0.04             | 1109                | 0.01             |
| 1192                                              | 0.08             | 1195                | 0.07             |
| 1244                                              | 0.04             | 1236                | 0.04             |
| 1337                                              | 0.05             | 1337                | 0.07             |
| 1422                                              | 0.06             | 1417                | 0.12             |
| 1475                                              | 0.22             | 1481                | 0.21             |
| 1539                                              | 0.11             | 1538                | 0.23             |
| 1595                                              | 0.08             | 1604                | 0.22             |
| 1656                                              | 0.49             | 1658                | 0.68             |
| 1720                                              | 1                | 1740                | 1                |

**Table S2.** Frequencies ( $\nu/\text{cm}^{-1}$ ) and relative IR intensities ( $I_{\text{rel}}$ ) of the strongest bands in the spectra of cytosine- $\text{d}_3$  (spectral region  $1300\text{-}1800\text{ cm}^{-1}$ ).

| Ar<br>matrixОшибка!<br>Закладка не<br>определена. |                  | B3LYP/def2-<br>TZVP |                  |
|---------------------------------------------------|------------------|---------------------|------------------|
| $\nu$                                             | $I_{\text{rel}}$ | $\nu$               | $I_{\text{rel}}$ |
| 1318                                              | 0.11             | 1307                | 0.03             |
| 1371                                              | 0.24             | 1366                | 0.21             |
| 1492                                              | 0.28             | 1485                | 0.42             |
| 1495                                              | 0.22             | 1509                | 0.25             |
| 1645                                              | 0.66             | 1642                | 0.50             |
| 1706                                              | 1                | 1722                | 1                |

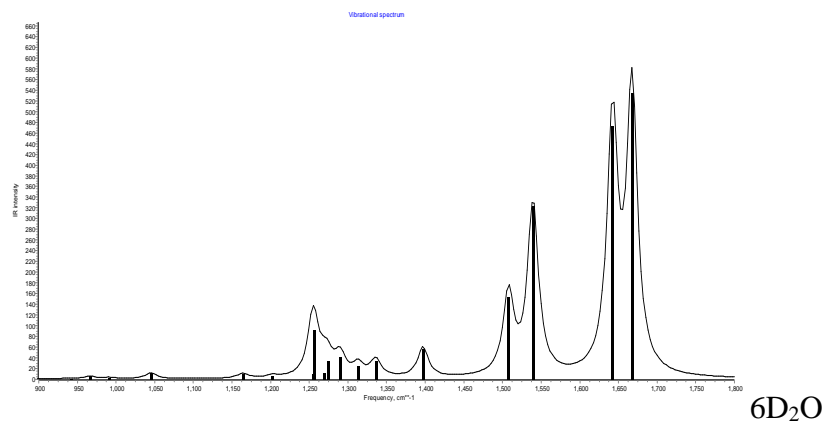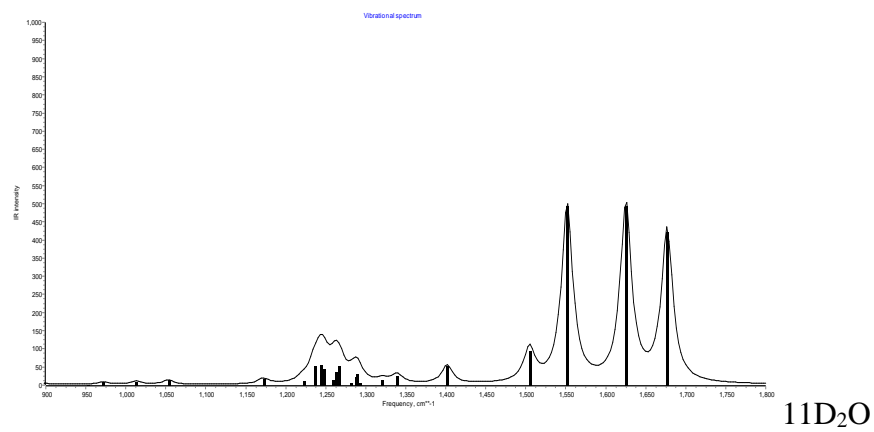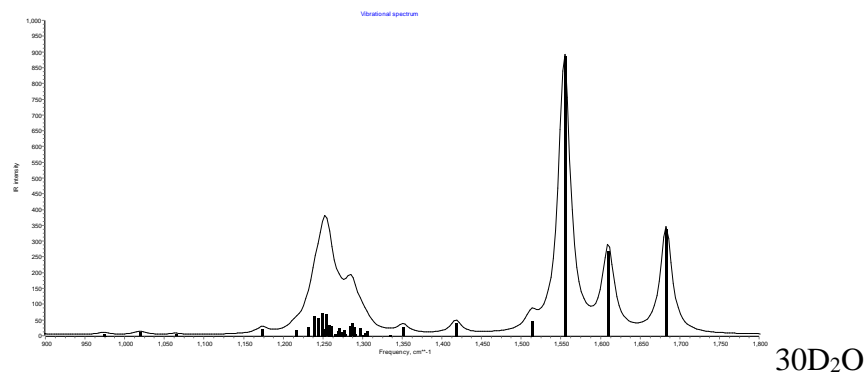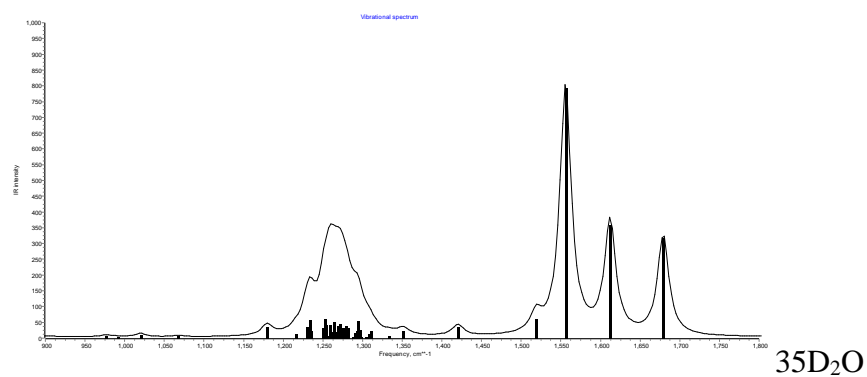

**Figure S2.** IR spectra of cytosine-d<sub>3</sub>, explicitly solvated with D<sub>2</sub>O molecules, simulated with the use of B97-3c method.

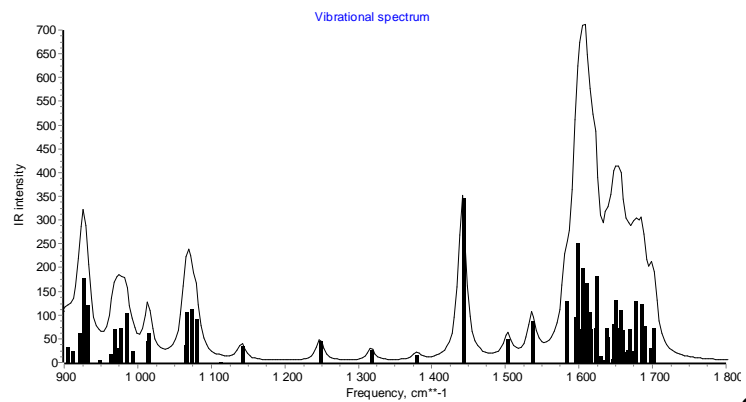

Cytosine-30H<sub>2</sub>O

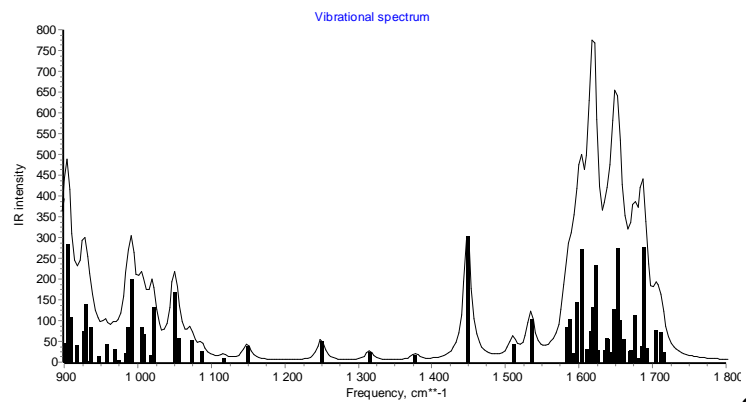

Cytosine-35H<sub>2</sub>O

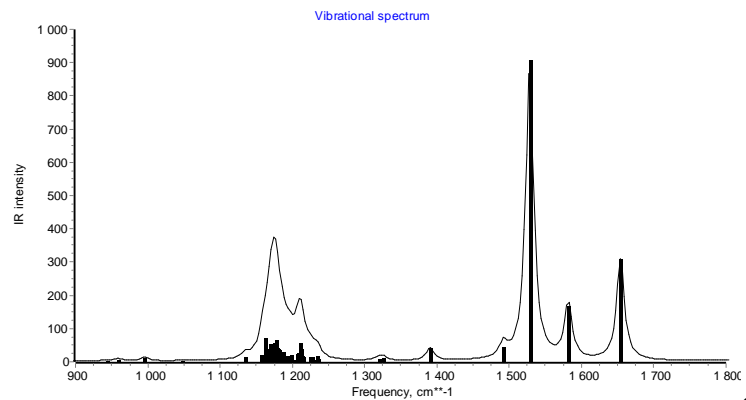

Cytosine-d<sub>3</sub>-30D<sub>2</sub>O

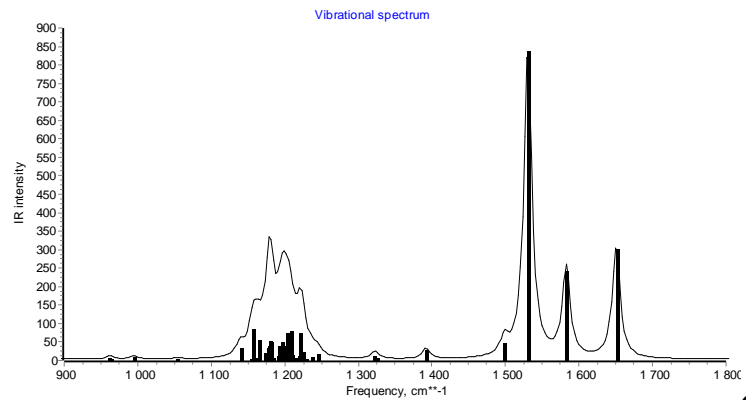

Cytosine-d<sub>3</sub>-35D<sub>2</sub>O

**Figure S3.** IR spectra of cytosine and cytosine-d<sub>3</sub>, explicitly solvated with H<sub>2</sub>O and D<sub>2</sub>O molecules, respectively, simulated with the use of PBE/def2-TZVP method.

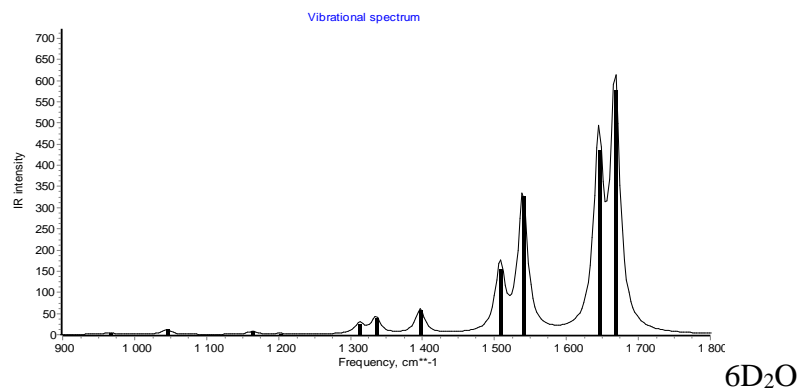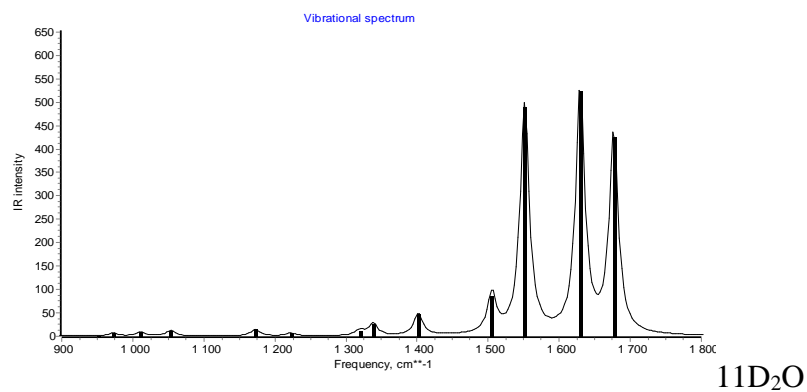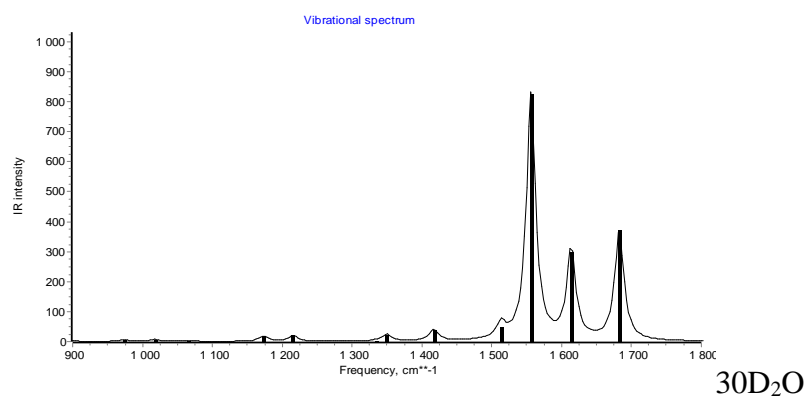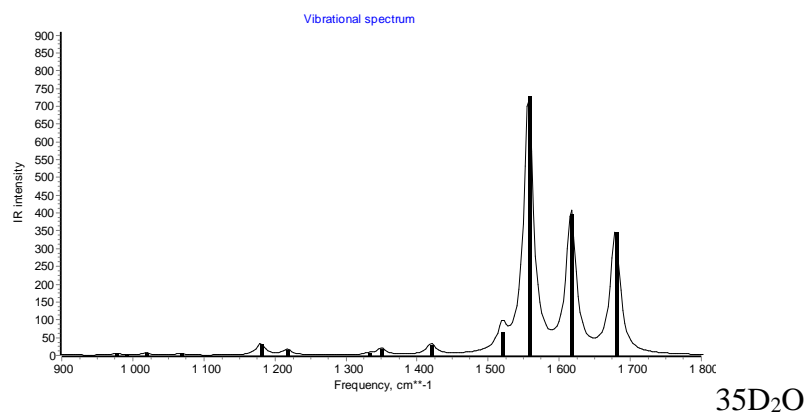

**Figure S2a.** IR spectra of cytosine-d<sub>3</sub>, explicitly solvated with heavy water molecules ( $m_H = m_O = 400$  aem, see main text), simulated with the use of B97-3c method. Comparison with Fig. S2 shows that the bands of cytosine that do not overlap with the bands of D<sub>2</sub>O (spectral region  $\sim 1300$ - $1800$  cm<sup>-1</sup>) do not change when D<sub>2</sub>O molecules are replaced by “heavy water”.

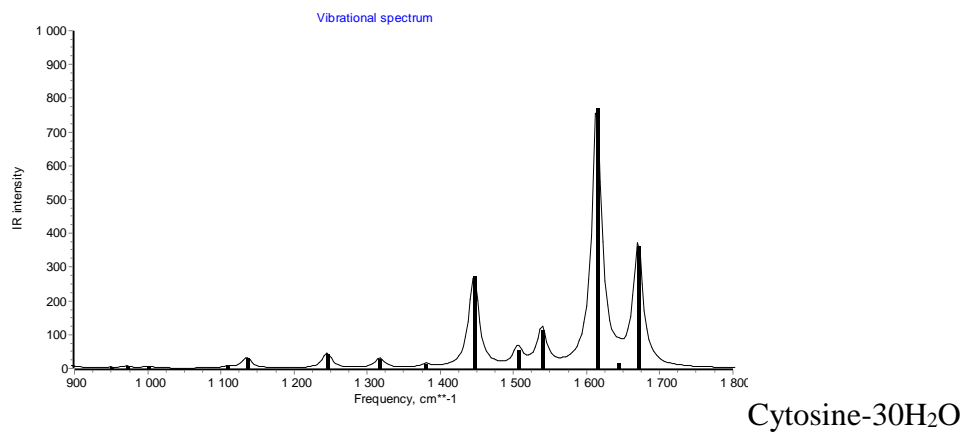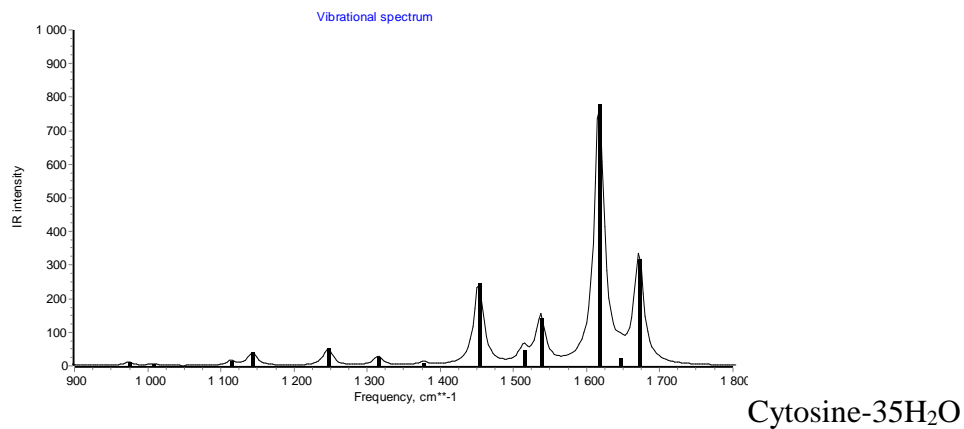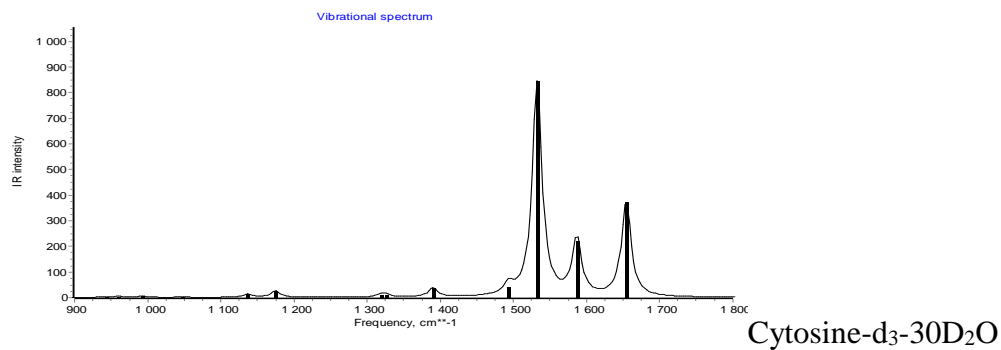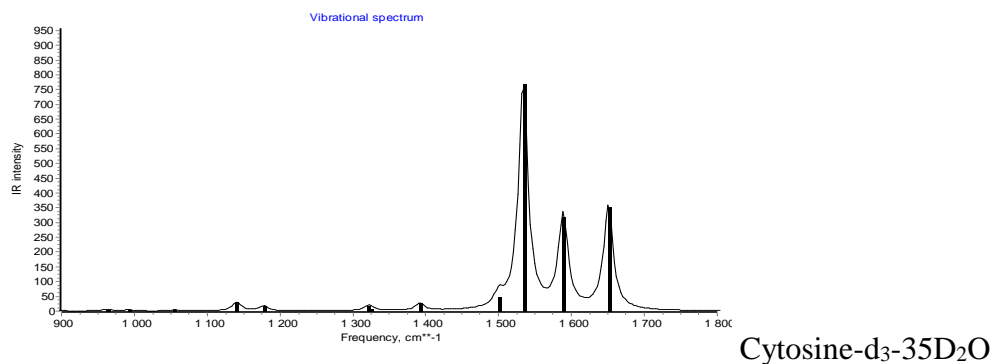

**Figure S3a.** IR spectra of cytosine and cytosine-d<sub>3</sub>, explicitly solvated with heavy water molecules ( $m_H = m_D = m_O = 400$  aem, see main text), simulated with the use of PBE/def2-TZVP method. Comparison with Fig. S3 shows that the bands of cytosine that do not overlap with the bands of H<sub>2</sub>O (spectral region  $\sim 1100-1550$  cm<sup>-1</sup>) or D<sub>2</sub>O (spectral region  $\sim 1300-1800$  cm<sup>-1</sup>) do not change when H<sub>2</sub>O or D<sub>2</sub>O are replaced by “heavy water”.



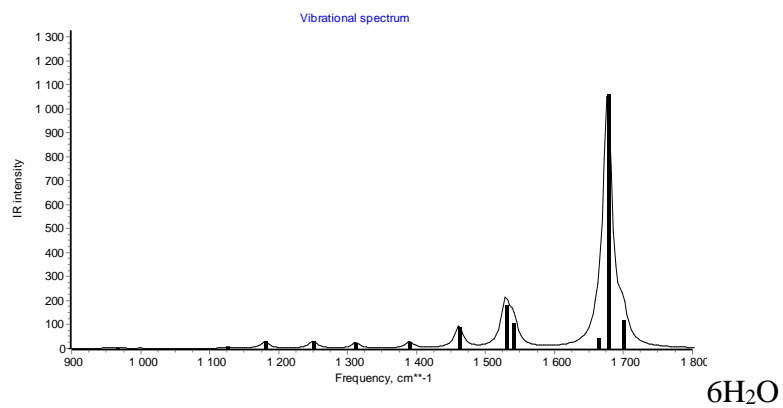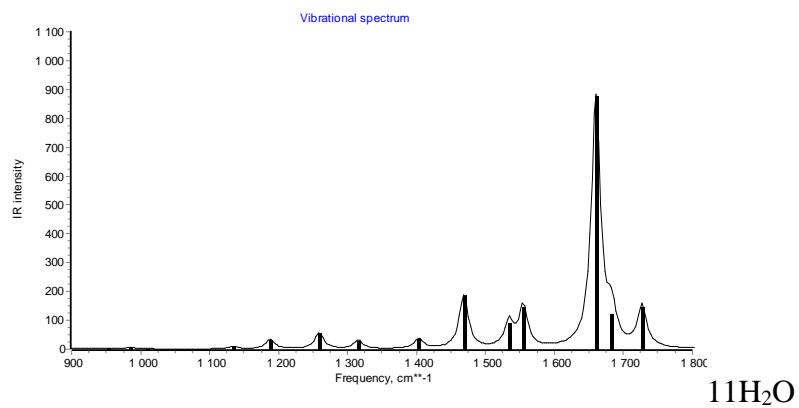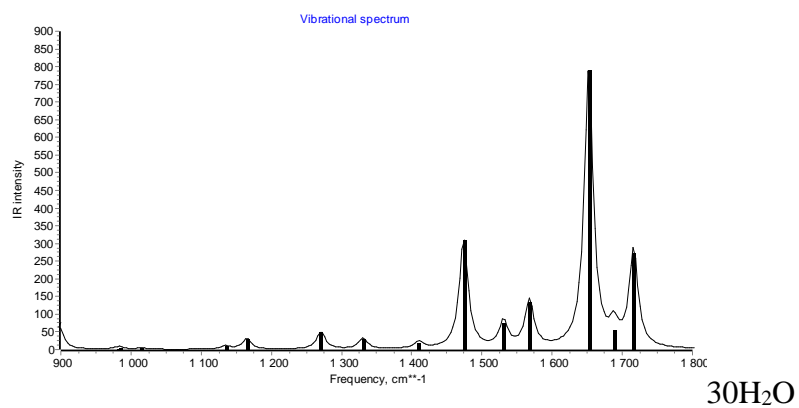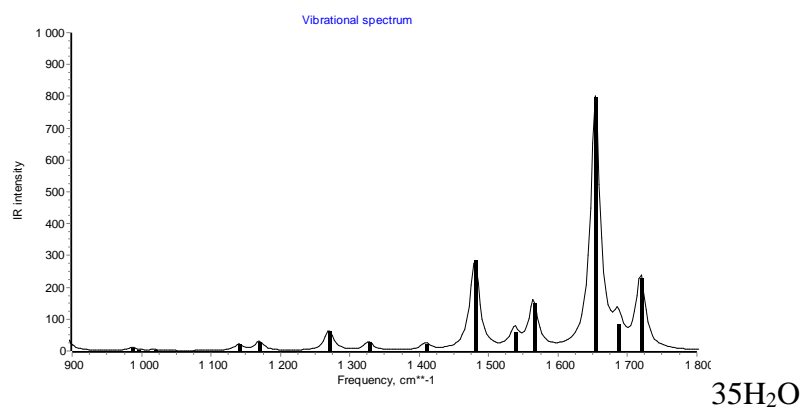

**Figure S4.** IR spectra of cytosine, explicitly solvated with heavy water molecules ( $m_H = m_O = 400$  aem, see main text), simulated with the use of B97-3c method.

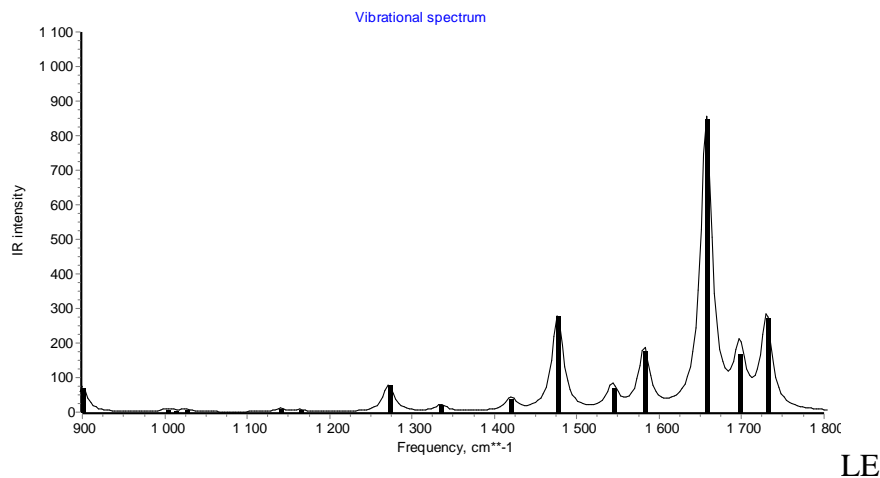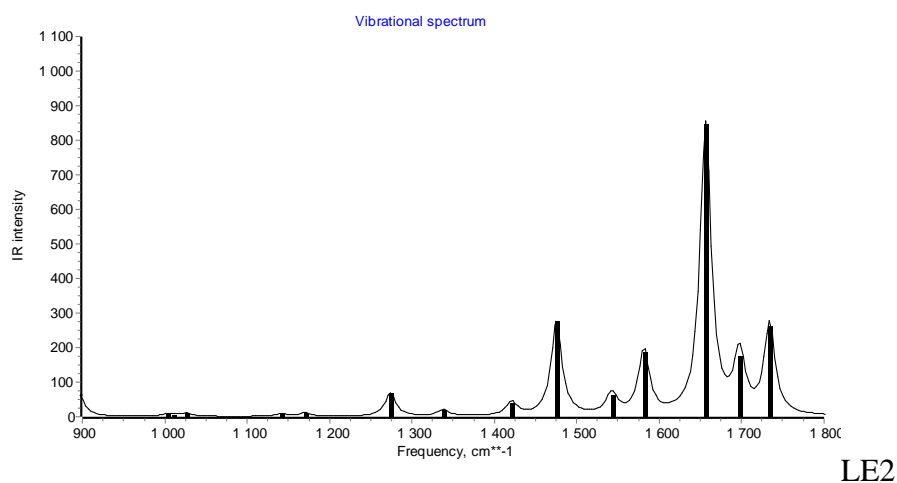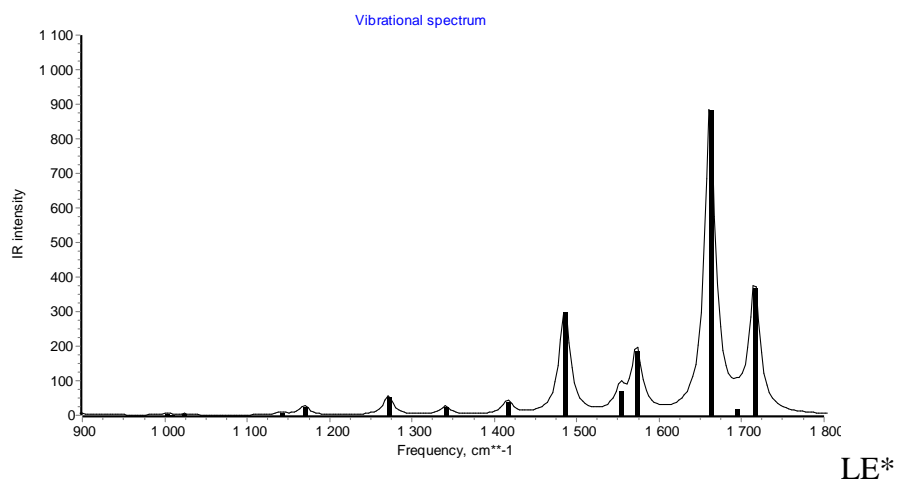

**Figure S5.** IR spectra of cytosine, explicitly solvated with 30 heavy water molecules ( $m_H = m_O = 400$  aem, see main text), simulated with the use of B3LYP-D3/def2-TZVP method for the lowest-energy (LE) and the second lowest energy (LE2) clusters from the generated ensemble of four clusters. The energy difference between LE and LE2 clusters = 2.4 cal/mol, and the corresponding Boltzmann weights of the clusters = 0.438 and 0.436, respectively. LE\* is the spectrum of the lowest-energy cluster generated in the different QCG run (see main text).

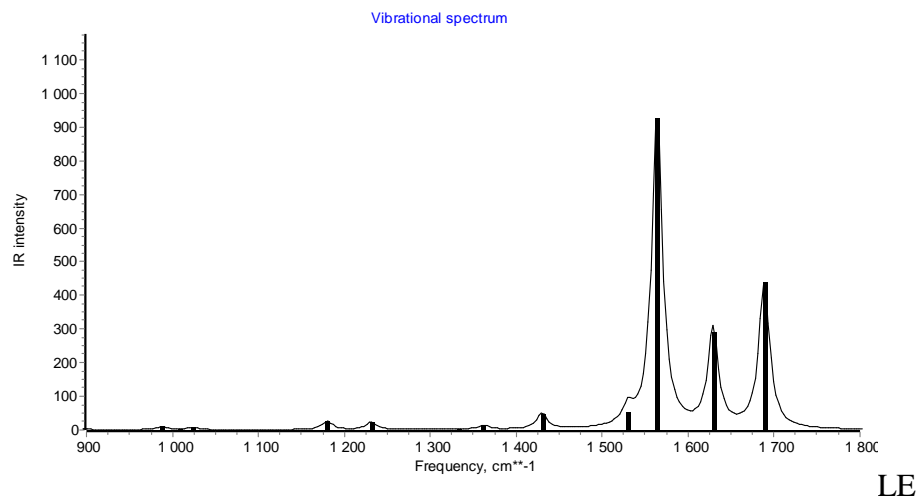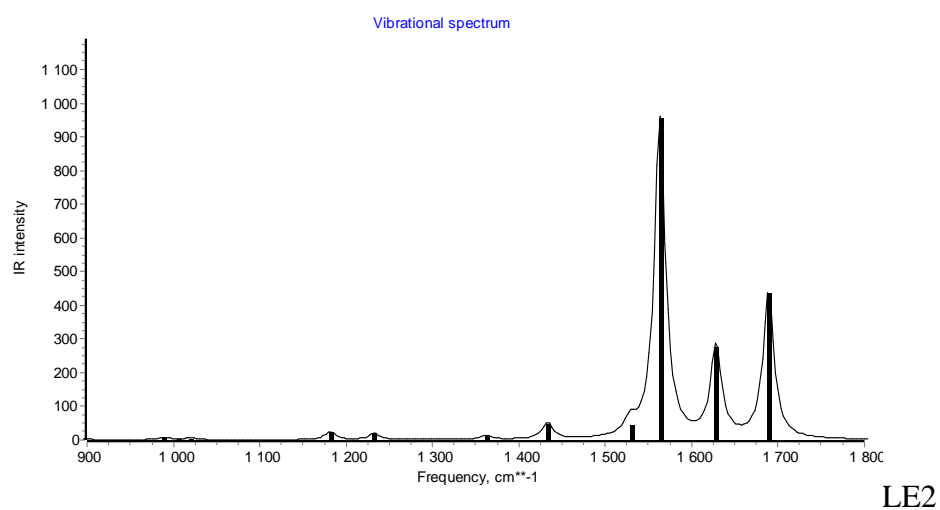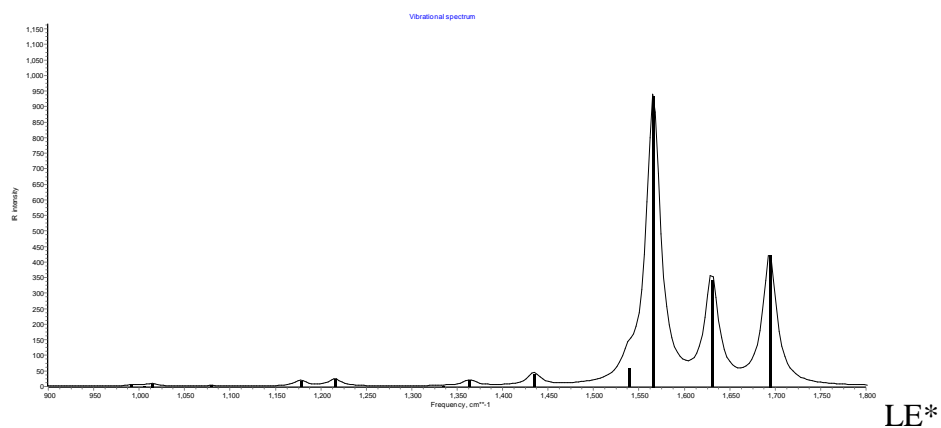

**Figure S6.** IR spectra of cytosine-d<sub>3</sub>, explicitly solvated with 30 heavy water molecules ( $m_D = m_O = 400$  aem, see main text), simulated with the use of B3LYP-D3/def2-TZVP method for the lowest-energy (LE) and the second lowest energy (LE2) clusters from the generated ensemble of four clusters. The energy difference between LE and LE2 clusters = 2.4 cal/mol, and the corresponding Boltzmann weights of the clusters = 0.438 and 0.436, respectively. LE\* is the spectrum of the lowest-energy cluster generated in the different QCG run (see main text).

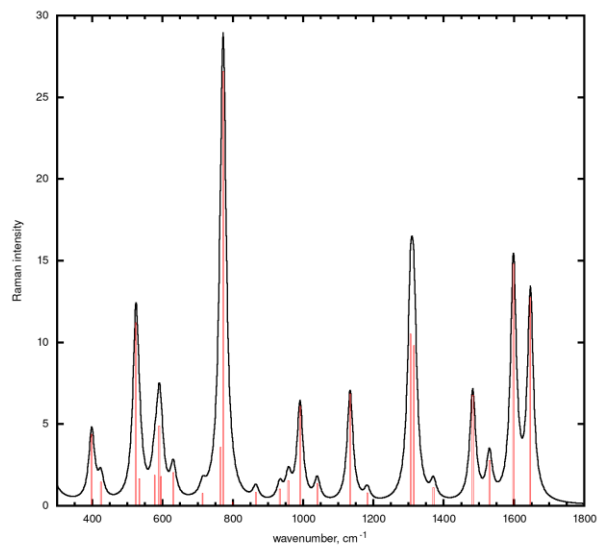

11D<sub>2</sub>O

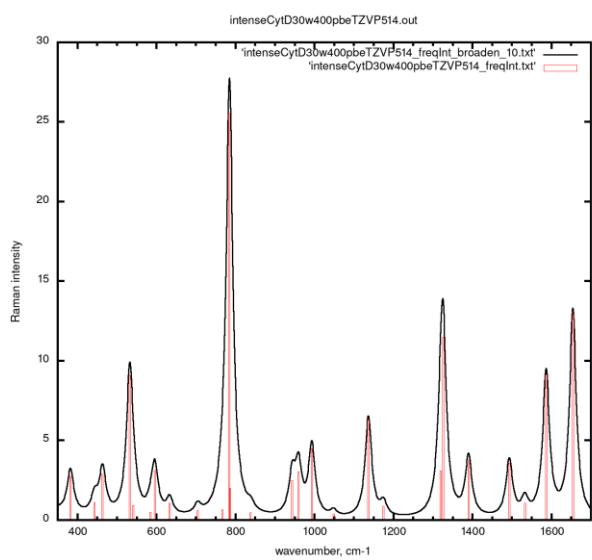

30D<sub>2</sub>O

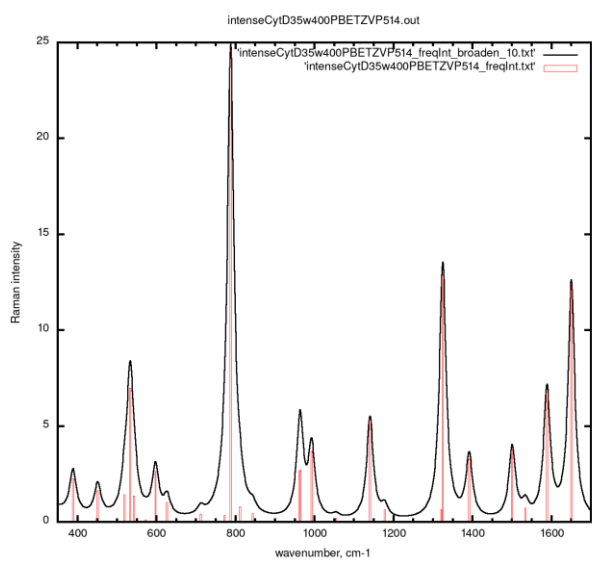

35D<sub>2</sub>O

**Figure S7.** Raman spectra of cytosine-d<sub>3</sub>, explicitly solvated with heavy water molecules ( $m_D = m_O = 400$  aem, see main text), simulated with the use of PBE/def2-TZVP method.

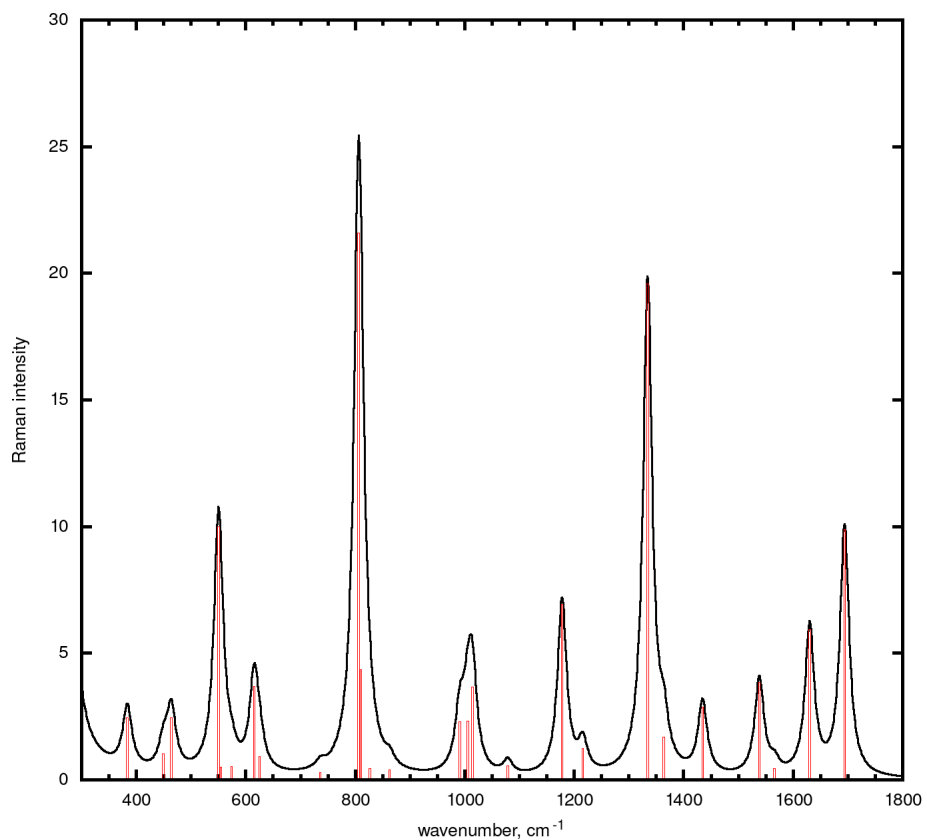

30D<sub>2</sub>O

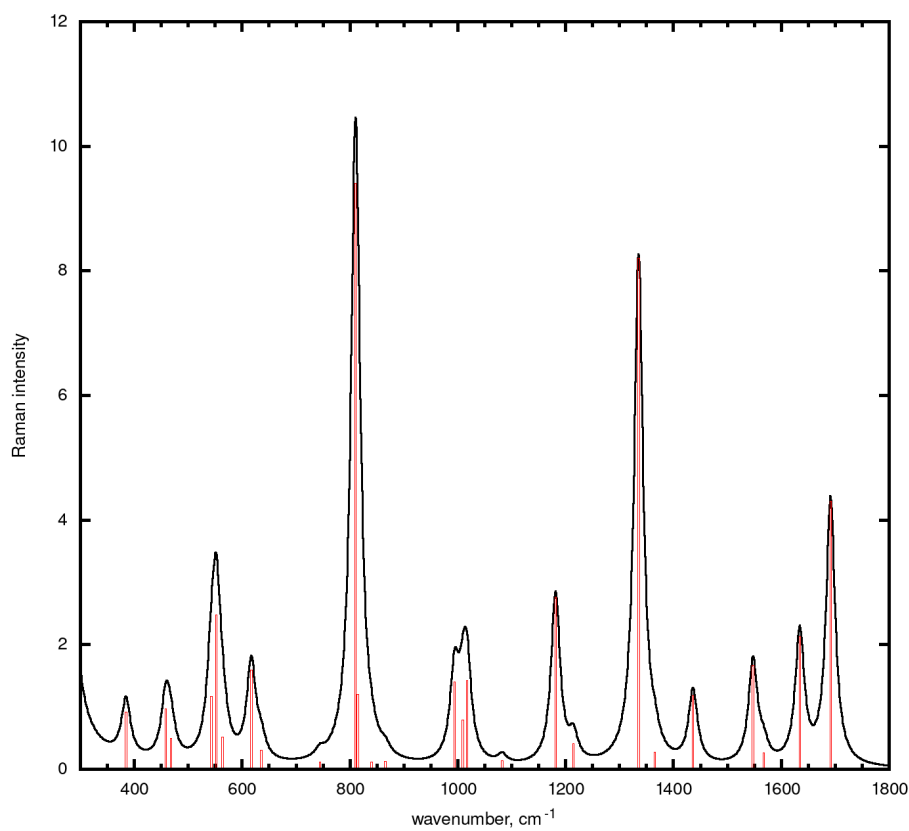

33D<sub>2</sub>O

**Figure S8.** Raman spectra of cytosine-d<sub>3</sub>, explicitly solvated with heavy water molecules ( $m_D = m_O = 400$  aem, see main text), simulated with the use of B3LYP/def2-TZVP method.

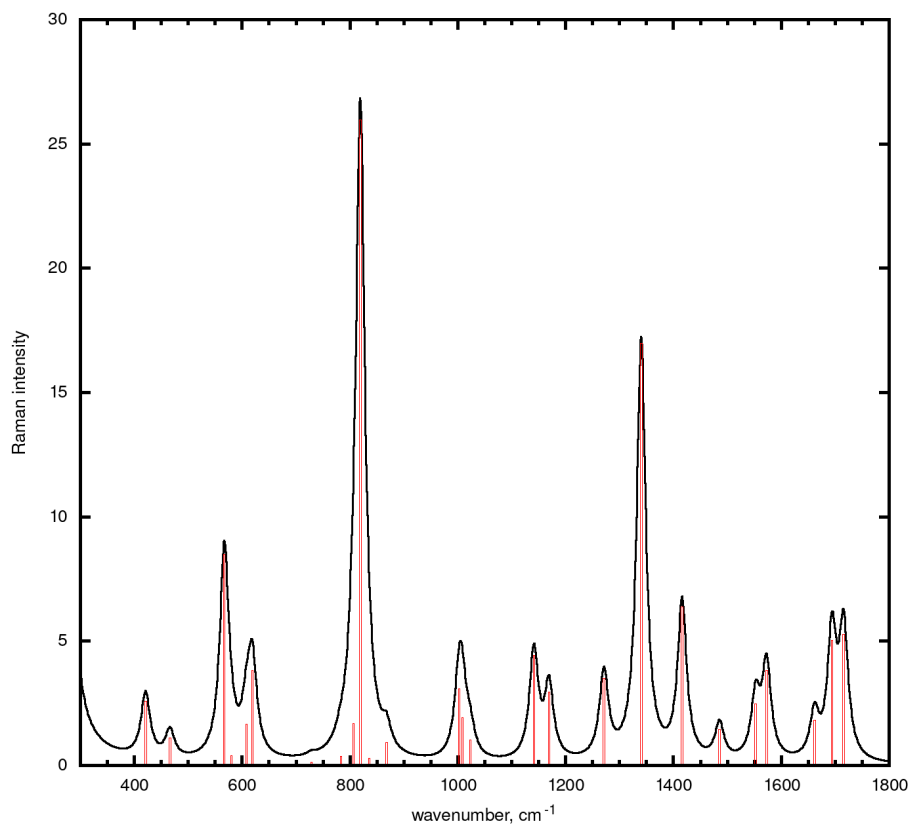

30H<sub>2</sub>O

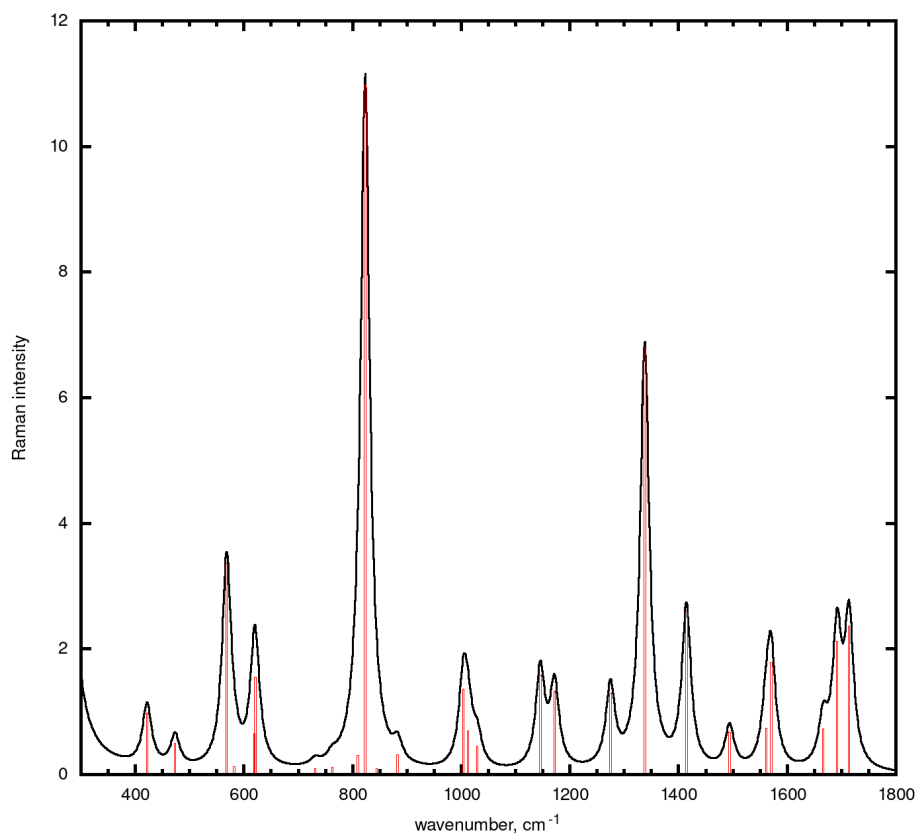

33H<sub>2</sub>O

**Figure S9.** Raman spectra of cytosine, explicitly solvated with heavy water molecules ( $m_H = m_O = 400$  aem, see main text), simulated with the use of B3LYP/def2-TZVP method.

**Table S3.** Non-scaled frequencies ( $\nu/\text{cm}^{-1}$ ) and relative Raman intensities ( $I_{\text{rel}}$ ) of the strongest bands in the spectra of cytosine- $\text{d}_3$  computed for various clusters cytosine- $\text{d}_3$ - $6\text{D}_2\text{O}$  with the use of PBE-D3/def2-TZVP method (spectral region  $700\text{-}1800\text{ cm}^{-1}$ ). 25 clusters were generated with relative energies (E) up to 0.6 kcal/mol.

| The lowest-energy cluster |                  | The fourth lowest-energy cluster (E = 0.1 kcal/mol) |                  | The highest-energy cluster (E = 0.6 kcal/mol) |                  |
|---------------------------|------------------|-----------------------------------------------------|------------------|-----------------------------------------------|------------------|
| $\nu$                     | $I_{\text{rel}}$ | $\nu$                                               | $I_{\text{rel}}$ | $\nu$                                         | $I_{\text{rel}}$ |
| 1613                      | 0.68             | 1613                                                | 0.68             | 1583                                          | 0.89             |
| 1522                      | 0.27             | 1522                                                | 0.27             | 1522                                          | 0.31             |
| 1289                      | 0.50             | 1289                                                | 0.50             | 1293                                          | 0.87             |
| 1124                      | 0.26             | 1124                                                | 0.27             | 1132                                          | 0.21             |
| 945                       | 0.24             | 945                                                 | 0.24             | 935                                           | 0.20             |
| 770                       | 1.00             | 770                                                 | 1.00             | 772                                           | 1.00             |

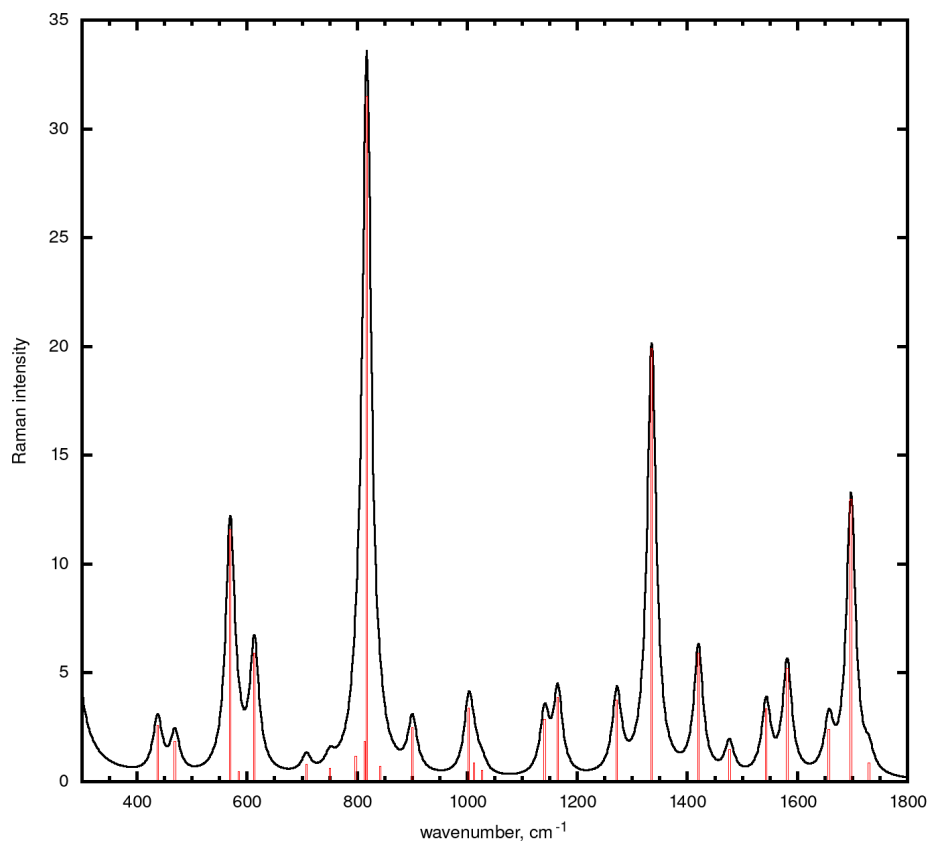

LE

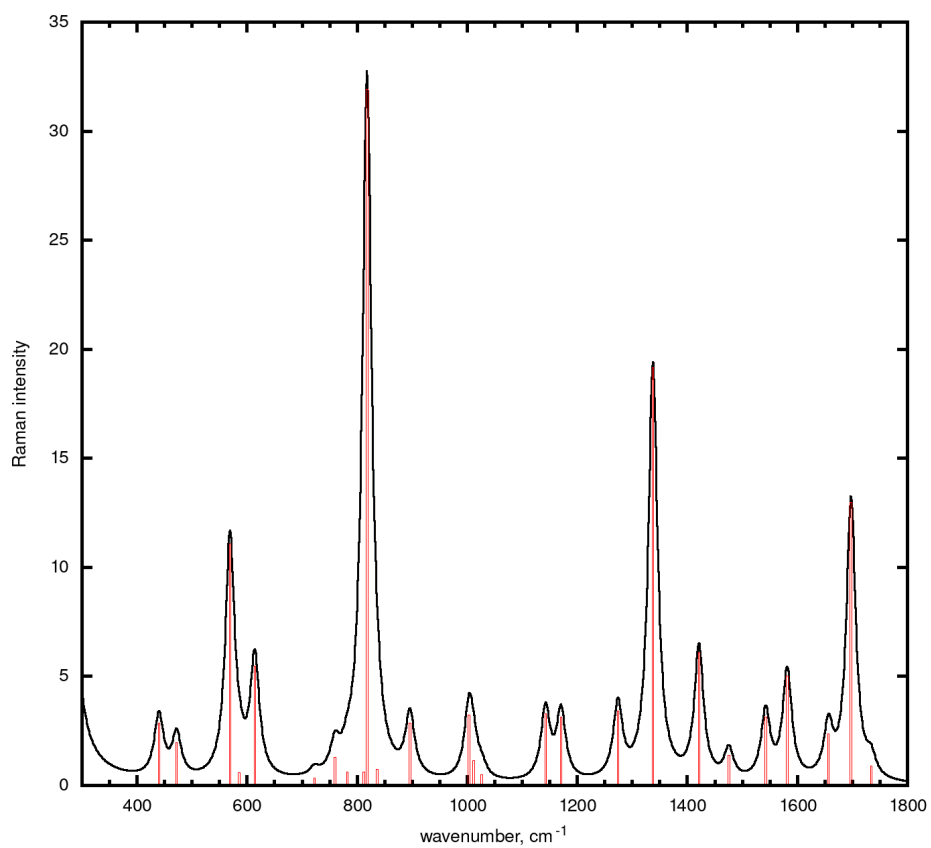

LE2



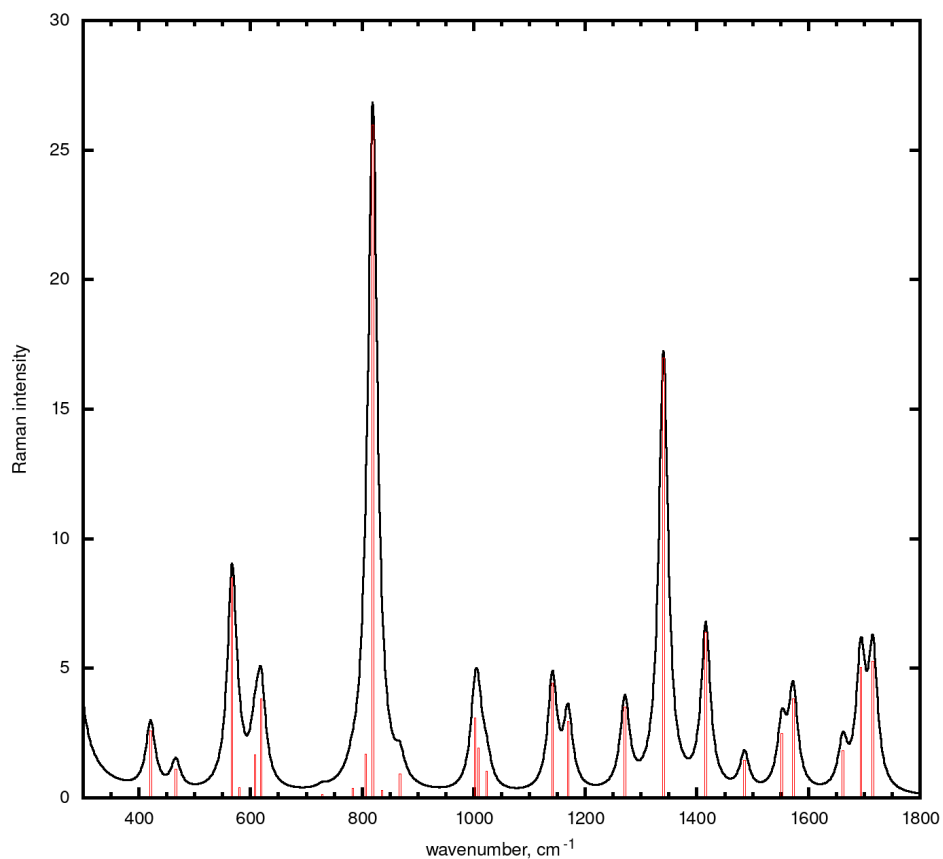

LE\*

**Figure S10.** Raman spectra of cytosine, explicitly solvated with 30 heavy water molecules ( $m_H = m_O = 400$  aem, see main text), simulated with the use of B3LYP-D3/def2-TZVP method for the lowest-energy (LE) and the second lowest energy (LE2) clusters from the generated ensemble of four clusters. The energy difference between LE and LE2 clusters = 2.4 cal/mol, and the corresponding Boltzmann weights of the clusters = 0.438 and 0.436, respectively. LE\* is the spectrum of the lowest-energy cluster generated in the different QCG run (see main text).

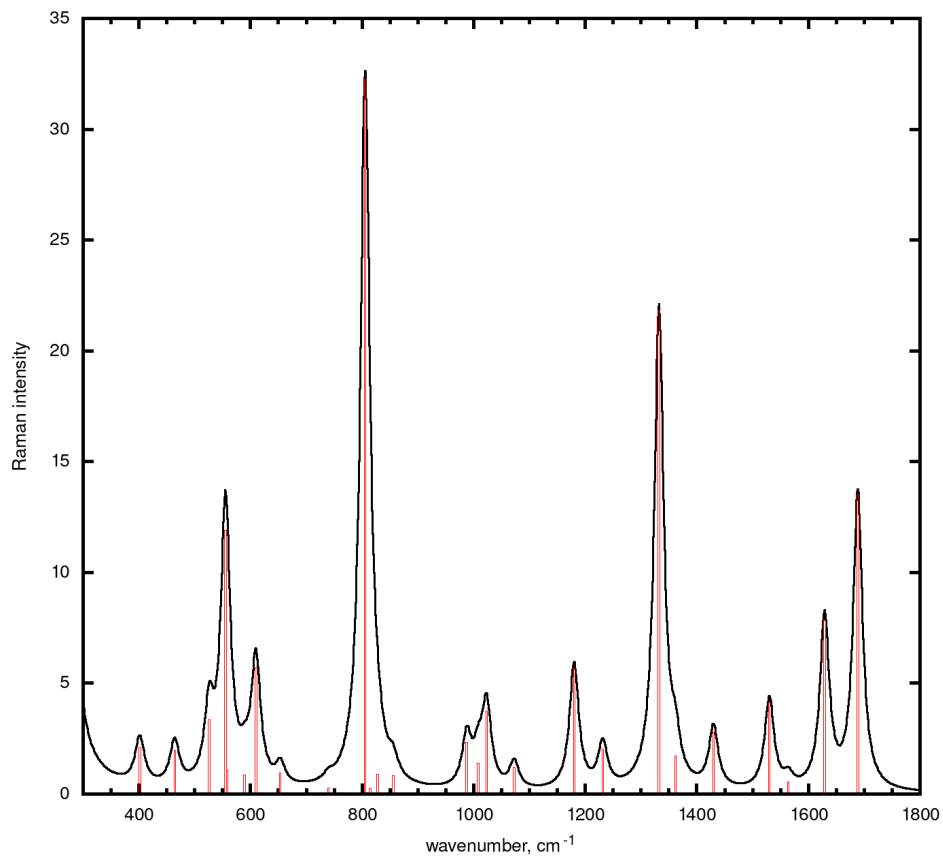

LE

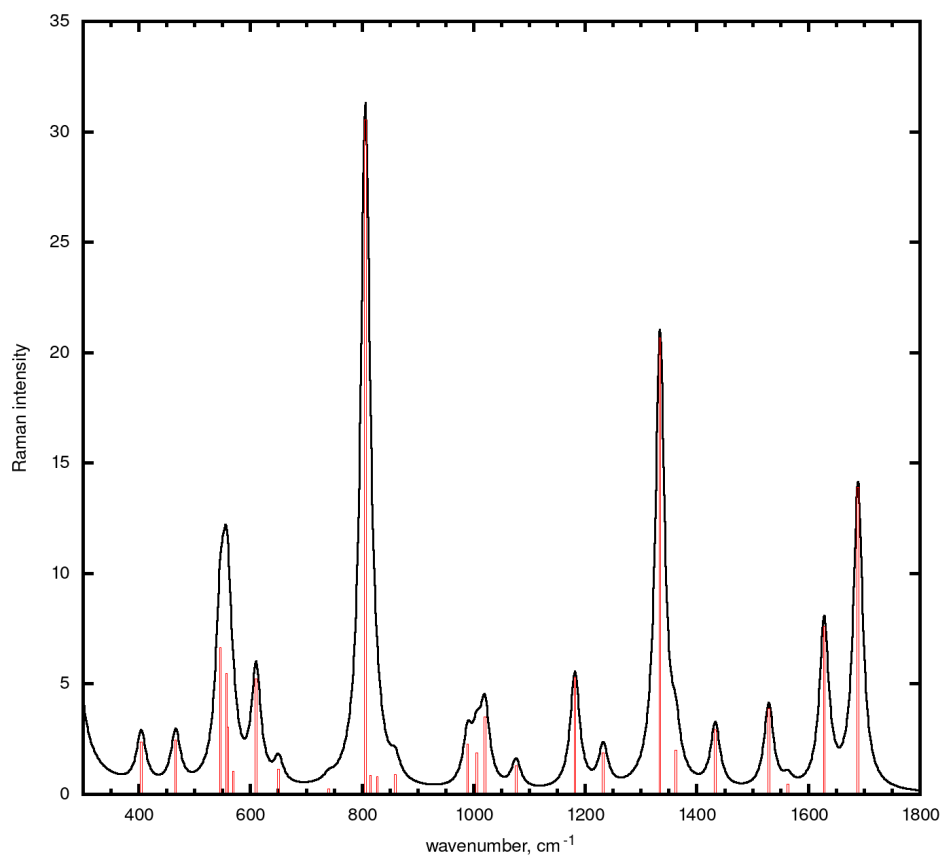

LE2

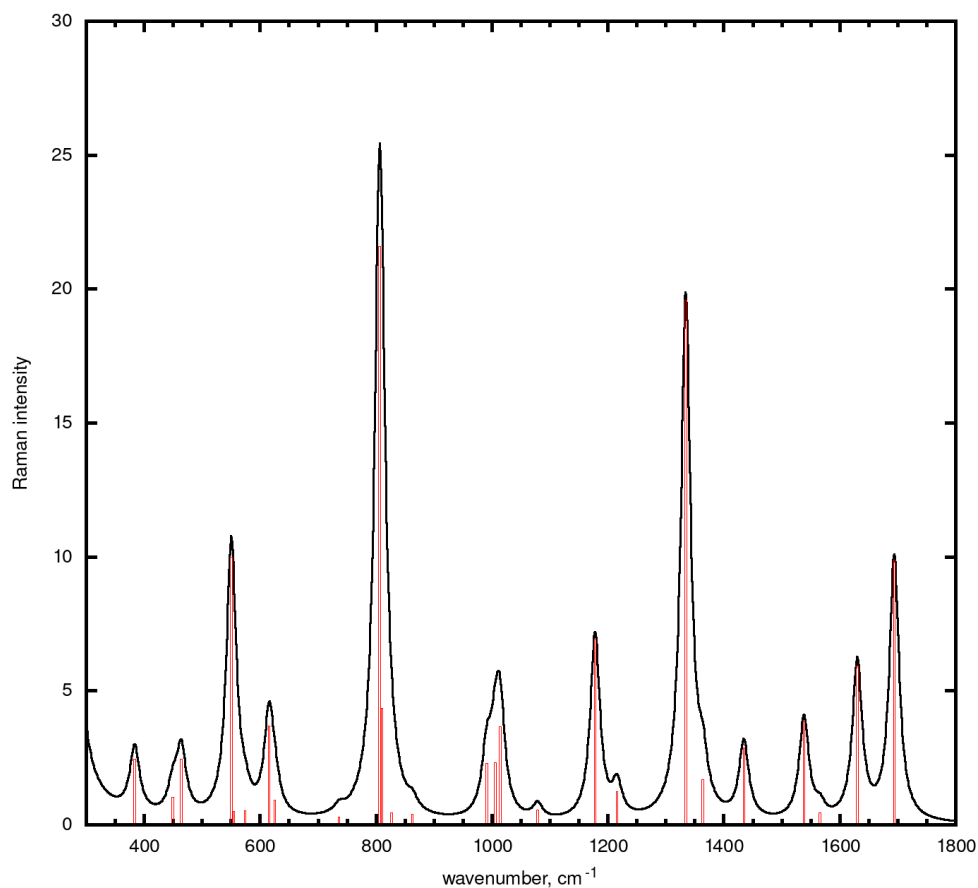

LE\*

**Figure S11.** Raman spectra of cytosine-d<sub>3</sub>, explicitly solvated with 30 heavy water molecules ( $m_D = m_O = 400$  aem, see main text), simulated with the use of B3LYP-D3/def2-TZVP method for the lowest-energy (LE) and the second lowest energy (LE2) clusters from the generated ensemble of four clusters. The energy difference between LE and LE2 clusters = 2.4 cal/mol, and the corresponding Boltzmann weights of the clusters = 0.438 and 0.436, respectively. LE\* is the spectrum of the lowest-energy cluster generated in the different QCG run (see main text).

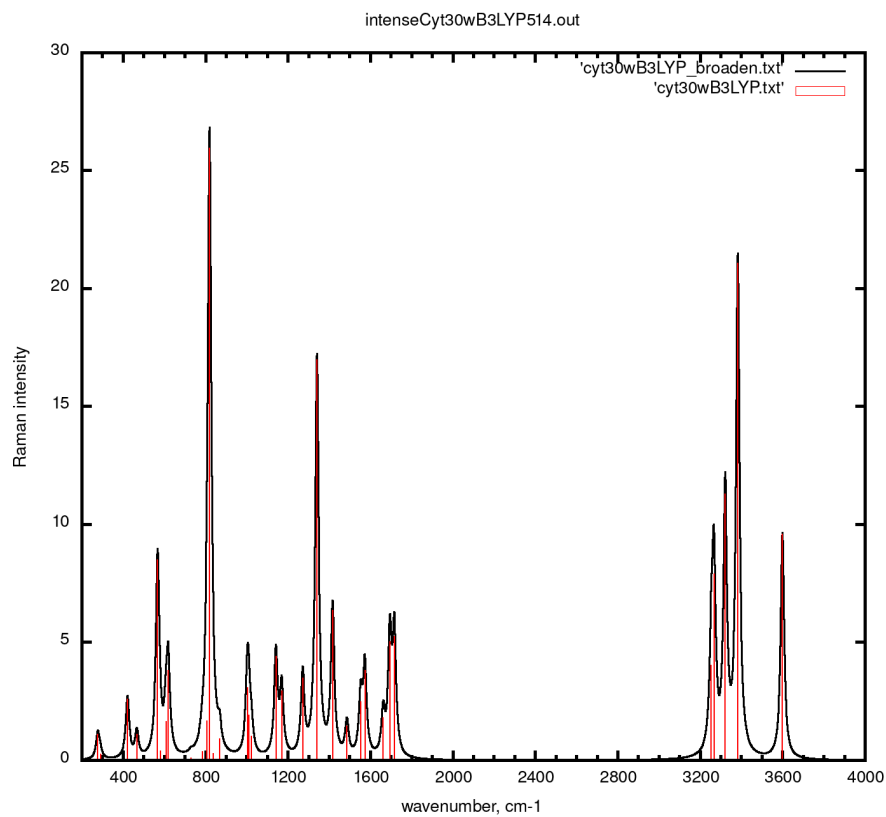

B3LYP/def2-TZVP

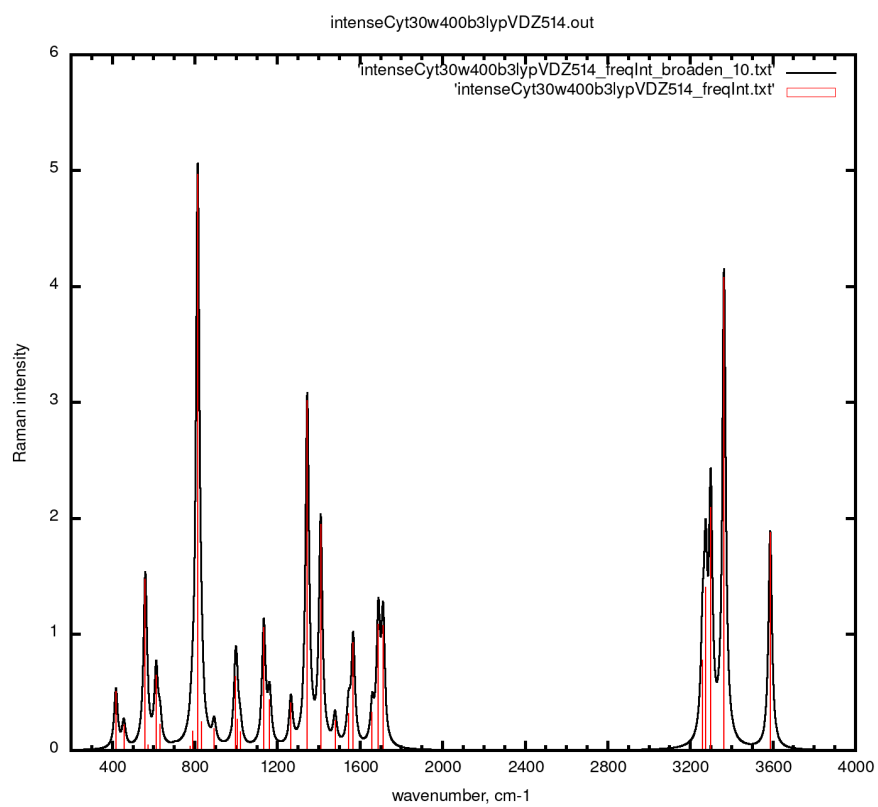

B3LYP/aug-cc-pVDZ

**Figure S12.** Raman spectra of cytosine, explicitly solvated with 30 heavy water molecules ( $m_H = m_O = 400$  aem, see main text), simulated with the use of B3LYP-D3/def2-TZVP and B3LYP-D3/aug-cc-pVDZ.

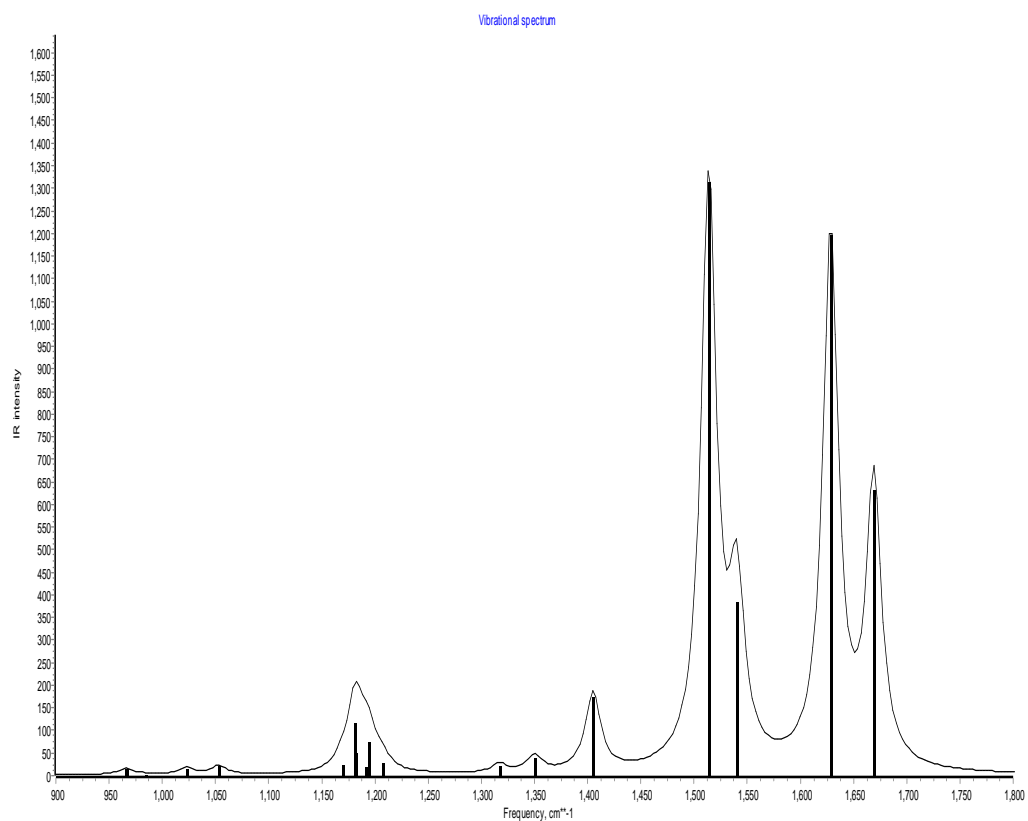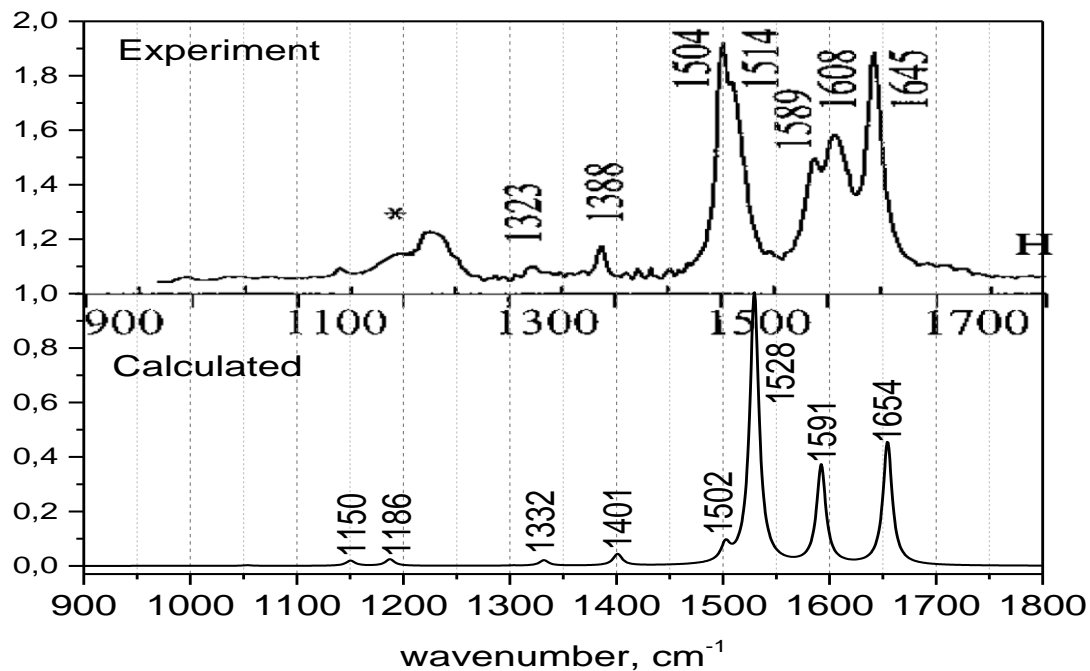

**Figure S13.** IR spectra simulated for clusters cytosine- $d_3$ : $4D_2O$  (top) and cytosine- $d_3$ : $30D_2O$  (bottom) with the use of protocols adopted in Ref. 3 and in present paper, respectively, in comparison to the experiment.
